# Supplementary material for: The effect of a long-term treatment with cannabidiol-rich hemp extract oil on the adenosinergic system of the zucker diabetic fatty (ZDF) rat atrium
Source: Front Pharmacol. 2022 Dec 15;13:1043275. doi: 10.3389/fphar.2022.1043275 (PMC9797669; doi:10.3389/fphar.2022.1043275)
Supplement: Supplementary file 2 [file Table2.XLS]

## Sheet: E CPA
log[CPA]	CPA E Ob		CPA E' Ob CBD	CPA E Ob CBD
-10	4.795		2.385	25.5075
-9	17.9725		7.13333	29.1311
-8	33.815		19.095	38.2593
-7	47.8625		34.7233	50.1857
-6	53.425		38.7233	53.2382
-5	55.66		40.8483	54.8599
-4	63.1625		44.2383	57.4469
CPA Ob					CPA Ob CBD
9.78	4.62	4.78	0		2.75	0	2.41	4.44	2.22	2.49
31.52	10.98	8.7	20.69		12.55	0	3.61	13.33	8.33	4.98
41.3	28.9	24.78	40.28		30.2	12.4	12.65	21.37	15.56	22.39
57.61	36.42	40.87	56.55		43.92	33.88	31.33	30.67	32.22	36.32
61.96	42.2	46.09	63.45		49.41	38.02	33.73	38.22	31.67	41.29
61.96	46.82	46.52	67.34		51.37	42.15	34.34	38.22	37.22	41.79
72.83	56.07	54.78	68.97		54.12	46.28	36.75	41.78	42.22	44.28
	CPA Ob		Cx Ob CBD		Ex Ob CBD
Emax	60.02		2.704e-09		23.6875
EC50	6.512e-09
n	0.4867

## Sheet: E Ado
log[Ado]	Ado E Ob		Ado E' Ob CBD	Ado E Ob CBD
-9	1.2225		10.7967	31.9267
-8	1.785		14.5783	34.8126
-7	6.82		19.8483	38.8342
-6	12.6725		25.3067	42.9996
-5	28.1625		34.715	50.1794
-4	46.975		47.545	59.9703
-3	55.7		60.1367	69.5793
Ado Ob					Ado Ob CBD
3.73	0	1.16	0		12.43	10.64	12	9.06	9.23	11.42
2.99	0	1.93	2.22		22.1	11.17	12	16.92	9.23	16.05
10.45	1.71	5.79	9.33		27.07	19.68	16	18.43	15.38	22.53
12.69	8	16.22	13.78		32.6	27.66	21	21.45	16.41	32.72
23.88	30.29	33.59	24.89		45.03	35.64	26	36.56	21.54	43.52
42.54	45.14	54.44	45.78		56.63	54.26	41	45.92	29.74	57.72
52.24	51.43	58.69	60.44		67.4	70.21	51	55.59	47.18	69.44
	CPA Ob		Cx Ob CBD		Ex Ob CBD
Emax	60.02		2.704e-09		23.6875
EC50	6.512e-09
n	0.4867
logEC50	-8.18629
			logcx (cx)	Ordinary fitting	Robust fitting	Ordinary fitting (for the intact curve)	Robust fitting (for the intact curve)
			Global fitting	-8.712 (1.94 nM)	-8.519 (3.02 nM)	-223	-223
			Individual fitting	-8.568 (2.7 nM)	-8.5 (3.2 nM)	-	-

## Sheet: RowData
log[Ado]	Ob				Ob+CBD
-9	3.73	0	1.16	0	12.43	10.64	12	9.06	9.23	11.42
-8	2.99	0	1.93	2.22	22.1	11.17	12	16.92	9.23	16.05
-7	10.45	1.71	5.79	9.33	27.07	19.68	16	18.43	15.38	22.53
-6	12.69	8	16.22	13.78	32.6	27.66	21	21.45	16.41	32.72
-5	23.88	30.29	33.59	24.89	45.03	35.64	26	36.56	21.54	43.52
-4	42.54	45.14	54.44	45.78	56.63	54.26	41	45.92	29.74	57.72
-3	52.24	51.43	58.69	60.44	67.4	70.21	51	55.59	47.18	69.44
log[CPA]	Ob				Ob+CBD
-10	9.78	4.62	4.78	0	2.75	0	2.41	4.44	2.22	2.49
-9	31.52	10.98	8.7	20.69	12.55	0	3.61	13.33	8.33	4.98
-8	41.3	28.9	24.78	40.28	30.2	12.4	12.65	21.37	15.56	22.39
-7	57.61	36.42	40.87	56.55	43.92	33.88	31.33	30.67	32.22	36.32
-6	61.96	42.2	46.09	63.45	49.41	38.02	33.73	38.22	31.67	41.29
-5	61.96	46.82	46.52	67.34	51.37	42.15	34.34	38.22	37.22	41.79
-4	72.83	56.07	54.78	68.97	54.12	46.28	36.75	41.78	42.22	44.28
